# Supplementary material for: CAM-type femoroacetabular impingement in male elite junior cross-country skiers and non-athlete controls: a cross-sectional MRI study
Source: PubMed Central journal article supplement — BMJ Open Sport Exerc Med. 2019 Jul 29;5(1):e000530. doi: 10.1136/bmjsem-2019-000530 (PMC6677994; doi:10.1136/bmjsem-2019-000530), 2019-07-29
Supplement: bmjsem-2019-000530supp001.pdf [file bmjsem-2019-000530supp001.pdf]

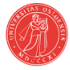

UiO : Universitetet i Oslo  
Det medisinske fakultet

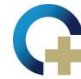

Oslo  
University Hospital

## "Femoroacetabular impingement in elite junior cross country skiers"

### Questionnaire about training

Name: \_\_\_\_\_

Age: \_\_\_\_\_

Do you participate in a specific sport? Yes No

In that case, what sport? \_\_\_\_\_

How many hours a week do you work out (in average)? \_\_\_\_\_

How many hours a year have you worked out (in average) the last three years)? \_\_\_\_\_

Mark the activities you use in your daily training, and estimate % of this activity used in your

|                   |     |       |
|-------------------|-----|-------|
| Running           | Yes | _____ |
| Rollerski classic | Yes | _____ |
| Rollerski skate   | Yes | _____ |
| Ski classic       | Yes | _____ |
| Ski skate         | Yes | _____ |
| Bike              | Yes | _____ |
| Strength training | Yes | _____ |

Do you do strength training for your legs?

Yes No

How many hours a month do you do leg strength training? \_\_\_\_\_

**Thank you!**
