# Supplementary material for: CAM-type femoroacetabular impingement in male elite junior cross-country skiers and non-athlete controls: a cross-sectional MRI study
Source: PubMed Central journal article supplement — BMJ Open Sport Exerc Med. 2019 Jul 29;5(1):e000530. doi: 10.1136/bmjsem-2019-000530 (PMC6677994; doi:10.1136/bmjsem-2019-000530), 2019-07-29
Supplement: bmjsem-2019-000530supp002.pdf [file bmjsem-2019-000530supp002.pdf]

**IHOT<sup>33</sup> International Hip Outcome Tool**

Spørreskjema om livskvalitet for unge, aktive personer med hofteproblemer

Navn:

Fødselsdato:

Dagens dato:

**Hvilken hofta gjelder skjemaet for?**

Hvis vi har bedt deg å svare spesifikt om en hofta, kryss av for den. Hvis ikke, kryss av for den du har mest problemer med.

 Venstre

 Høyre
**Instruksjoner**

- Disse spørsmålene handler om problemene som du kan oppleve på grunn av hoften din, hvordan disse problemene påvirker livet ditt, samt hvordan du følelsesmessig opplever disse problemene.
- Vennligst indiker alvorlighetsgraden ved å sette en strek på linjen under hvert spørsmål.

- Hvis du setter streken helt til venstre, betyr det at du opplever betydelige begrensninger.

For eksempel:

BETYDELIG / INGEN  
BEGRENSET \_\_\_\_\_ PROBLEMER

- Hvis du setter streken helt til høyre, betyr det at du ikke opplever noen problemer med hoften. For eksempel:

BETYDELIG / INGEN  
BEGRENSET \_\_\_\_\_ PROBLEMER

- Hvis du setter streken midt på linjen, betyr det at du opplever moderate begrensninger, eller, med andre ord, midt mellom ytterpunktene "betydelig begrenset" og "ingen problemer". Det er viktig at du setter streken på en av endene av linjen hvis det beskriver din situasjon best.

- Svar med tanke på den typiske situasjonen den siste måneden.

TIPS: Hvis du ikke gjør aktivitetene beskrevet under, forestill deg hvordan hoften ville kjennes ut hvis du måtte utføre aktiviteten.

**DEL 1 SYMPTOMER OG FUNKSJONSBEGRENSNINGER**

De følgende spørsmålene handler om symptomer du kan oppleve i hoften, og om hoftens funksjon i daglige aktiviteter. Svar med tanke på hvordan du har følt mesteparten av tiden den siste måneden.

S1 Hvor ofte verker det i hoften/lysken?

HELE / ALDRI  
TIDEN \_\_\_\_\_

S2 Hvor stiv blir hoften etter at du har sittet/vært i ro i løpet av dagen?

EKSTREMT / IKKE STIV  
STIV \_\_\_\_\_

Oversatt av  2014

S3 Hvor vanskelig er det for deg å gå lengre avstander?

EKSTREMT  
VANSKELIG \_\_\_\_\_ IKKE  
VANSKELIG

S4 Hvor mye smerte har du i hoften når du sitter?

EKSTREMT  
SMERTE \_\_\_\_\_ INGEN  
SMERTE

S5 Hvor store problemer har du med å stå over en lengre periode?

SVÆRT STORE  
PROBLEMER \_\_\_\_\_ INGEN  
PROBLEMER

S6 Hvor vanskelig er det for deg å komme deg opp fra og ned på gulvet/bakken?

EKSTREMT  
VANSKELIG \_\_\_\_\_ IKKE  
VANSKELIG

S7 Hvor vanskelig er det for deg å gå på ujevnt underlag?

EKSTREMT  
VANSKELIG \_\_\_\_\_ IKKE  
VANSKELIG

S8 Hvor vanskelig er det for deg å ligge på siden med den affiserte hoften ned?

EKSTREMT  
VANSKELIG \_\_\_\_\_ IKKE  
VANSKELIG

S9 Hvor store problemer har du med å gå over hindringer?

SVÆRT STORE  
PROBLEMER \_\_\_\_\_ INGEN  
PROBLEMER

S10 Hvor store problemer har du med å gå opp/ned trapper?

SVÆRT STORE  
PROBLEMER \_\_\_\_\_ INGEN  
PROBLEMER

S11 Hvor store problemer har du med å reise deg fra sittende stilling?

SVÆRT STORE  
PROBLEMER \_\_\_\_\_ INGEN  
PROBLEMER

Oversatt av  2014

S12 Hvor mye ubehag har du hvis du tar lange steg?

EKSTREMT UBEHAG \_\_\_\_\_ IKKE NOE UBEHAG

S13 Hvor vanskelig er det for deg å gå inn/ut av bilen?

EKSTREMT VANSKELIG \_\_\_\_\_ IKKE VANSKELIG

S14 Hvor store problemer har du med gnissing/ skjæring, låsning eller klikking i hoften?

SVÆRT STORE PROBLEMER \_\_\_\_\_ INGEN PROBLEMER

S15 Hvor vanskelig er det for deg å ta av/på sokker, strømpes eller sko?

EKSTREMT VANSKELIG \_\_\_\_\_ IKKE VANSKELIG

S16 Totalt sett, hvor mye smerte har du hoften/lysken?

EKSTREM SMERTE \_\_\_\_\_ INGEN SMERTE

## DEL 2 IDRETT OG FRITIDSAKTIVITETER

De følgende spørsmålene handler om **hoften** din når du deltar i idrett og fritidsaktiviteter.

Svar med tanke på hvordan du har følt mesteparten av tiden den siste **måneden**.

S17 Hvor bekymret er du for din evne til å opprettholde ditt ønskede aktivitetsnivå?

EKSTREMT BEKYMRET \_\_\_\_\_ IKKE BEKYMRET

S18 Hvor mye smerte har du i hoften *etter* aktivitet?

EKSTREM SMERTE \_\_\_\_\_ INGEN SMERTE

S19 Hvor bekymret er du for at smertene i hoften vil øke hvis du deltar i idrett eller fritidsaktiviteter?

EKSTREMT BEKYMRET \_\_\_\_\_ IKKE BEKYMRET

S20 Hvor mye har livskvaliteten blitt redusert fordi du ikke kan delta i idrett/fritidsaktiviteter?

EKSTREMT IKKE  
REDUSERT \_\_\_\_\_ REDUSERT

S21 Hvor bekymret er du for å utføre vendinger/retningsendringer under sportslige aktiviteter?

Jeg gjør ikke denne typen aktivitet

EKSTREMT IKKE  
BEKYMRET \_\_\_\_\_ BEKYMRET

S22 Hvor mye er prestasjonsnivået ditt blitt redusert i idrett eller fritidsaktivitet?

EKSTREMT IKKE  
REDUSERT \_\_\_\_\_ REDUSERT

### DEL 3 ARBEIDSRELATERTE UTFORDRINGER

De følgende spørsmålene handler om hoften din med tanke på nåværende arbeidssituasjon.

Svar med tanke på hvordan du har følt mesteparten av tiden den siste måneden.

Jeg er ikke i jobb, på grunn av hoften min (hopp over denne delen)

Jeg er ikke i jobb, men av andre grunner enn hoften min (hopp over denne delen)

S23 Hvor store problemer har du når du dytter, drar, løfter eller bærer tunge gjenstander på jobb?

Jeg gjør ikke denne typen aktivitet

ALVORLIGE INGEN  
PROBLEMER \_\_\_\_\_ PROBLEMER

S24 Hvor store problemer har du med å sette deg på huk og reise deg opp igjen?

SVÆRT STORE INGEN  
PROBLEMER \_\_\_\_\_ PROBLEMER

S25 Hvor bekymret er du for at din arbeidsaktivitet vil gjøre hoften verre?

EKSTREMT IKKE  
BEKYMRET \_\_\_\_\_ BEKYMRET

S26 Hvor vanskelig er det å utføre jobben din på grunn av redusert bevegelighet i hoften?

EKSTREMT IKKE  
VANSKELIG \_\_\_\_\_ VANSKELIG

**DEL 4 SOSIALE, FØLESEMESSIGE OG LIVSSTILSUTFORDRINGER**

De følgende spørsmålene handler om sosiale, følesemessige og livsstilsutfordringer du kan oppleve på grunn av hofteplagene. Svar med tanke på hvordan du har følt mesteparten av tiden den siste måneden.

S27 Hvor frustrert er du på grunn av hofteplagene dine?

EKSTREMT IKKE  
FRUSTRERT \_\_\_\_\_ FRUSTRERT

S28 Hvor store problemer har du med seksuell aktivitet på grunn av hoften?

Dette er ikke relevant for meg

ALVORLIGE INGEN  
PROBLEMER \_\_\_\_\_ PROBLEMER

S29 Hvor forstyrrende er dine hofteproblemer?

EKSTREMT IKKE  
FORSTYRRENDE \_\_\_\_\_ FORSTYRRENDE

S30 Hvor vanskelig er det for deg å bli kvitt spenninger og stress på grunn av hofteplagene dine?

EKSTREMT IKKE  
VANSKELIG \_\_\_\_\_ VANSKELIG

S31 Hvor motløs er du på grunn av hofteplagene dine?

EKSTREMT IKKE  
MOTLØS \_\_\_\_\_ MOTLØS

S32 Hvor bekymret er du for å løfte eller bære barn på grunn av hoften?

Dette er ikke relevant for meg

EKSTREMT IKKE  
BEKYMRET \_\_\_\_\_ BEKYMRET

S33 Hvor ofte tenker du over hofteproblemene dine?

HELE TIDEN \_\_\_\_\_ ALDRI
